# Supplementary material for: Effects of Electrochemotherapy on Immunologically Important Modifications in Tumor Cells
Source: MDPI journal article supplement (doi:10.3390/vaccines11050925), 2023-04-30
Supplement: s1 [file s1]

## **SUPPLEMENTARY INFORMATION**

### **Effects of electrochemotherapy on immunologically important modifications in tumor cells**

Ursa Kesar, Bostjan Markelc, Tanja Jesenko, Katja Ursic Valentinuzzi, Maja Cemazar, Primoz Strojan  
and Gregor Sersa

## Supplementary materials

**Table S1:** Cell densities for clonogenic assay with CDDP and OXA.

|                                                  |            | CDDP and OXA |     |     |     |     |     |                               |                               |     |     |
|--------------------------------------------------|------------|--------------|-----|-----|-----|-----|-----|-------------------------------|-------------------------------|-----|-----|
| Chemotherapeutic concentration ( $\mu\text{M}$ ) |            | 0            | 2.5 | 5   | 10  | 15  | 20  | 30                            | 40                            | 60  | 80  |
| No. of cells/well                                | without EP | 75           | 75  | 75  | 75  | 75  | 75  | 100 (75 for B16-F10 with OXA) | 150 (75 for B16-F10 with OXA) | 75  | 75  |
|                                                  | with EP    | 100          | 100 | 150 | 150 | 200 | 200 | 300                           | 400                           | 400 | 400 |

**Table S2:** Cell densities for clonogenic assay with BLM.

|                                     |            | BLM |      |     |     |     |     |     |
|-------------------------------------|------------|-----|------|-----|-----|-----|-----|-----|
| Chemotherapeutic concentration (nM) |            | 0   | 0.01 | 0.1 | 0.5 | 1.0 | 1.3 | 1.8 |
| No. of cells/well                   | without EP | 50  | 75   | 75  | 75  | 75  | 100 | 100 |
|                                     | with EP    | 100 | 100  | 150 | 150 | 150 | 200 | 250 |

**Table S3:** List of antibodies used.

| Antibodies                                                                 | Sources                  | Cat#          | Volume per sample (μL) |
|----------------------------------------------------------------------------|--------------------------|---------------|------------------------|
| MHC class I (H-2Kb) Monoclonal Antibody (AF6-88.5.5.3), APC                | Thermo Fisher Scientific | 17-5958-82    | 0.5                    |
| MHC class I (H-2Kd) Monoclonal Antibody (SF1-1.1.1), APC                   | Thermo Fisher Scientific | 17-5957-82    | 0.5                    |
| MHC class II (I-A/I-E) Monoclonal Antibody (M5/114.15.2), Super Bright 780 | Thermo Fisher Scientific | 78-5321-82    | 0.5                    |
| Anti-Mouse CD274 (B7-H1), PE 100 μg (PD-L1)                                | Thermo Fisher Scientific | 12-5982-82    | 0.5                    |
| Calreticulin Antibody (DyLight 405), 0.1 mL                                | Novus Biologicals        | NV-NB600-101V | 1                      |
| CD40 Monoclonal Antibody (1C10), Super Bright 600                          | Thermo Fisher Scientific | 63-0401-82    | 1.5                    |

**Table S4:** Determined IC values for all chemotherapeutics.

the

| <b>A</b>         |             |              |              | <b>B</b>        |             |              |              |
|------------------|-------------|--------------|--------------|-----------------|-------------|--------------|--------------|
| <b>CDDP (μM)</b> | <b>IC30</b> | <b>IC50</b>  | <b>IC70</b>  | <b>OXA (μM)</b> | <b>IC30</b> | <b>IC50</b>  | <b>IC70</b>  |
| <b>B16-F10</b>   | 6.86 ± 0.73 | 12.90 ± 1.46 | 17.87 ± 1.93 | <b>B16-F10</b>  | 8.89 ± 2.42 | 24.46 ± 2.57 | 39.29 ± 3.58 |
| <b>4T1</b>       | 5.23 ± 1.65 | 13.80 ± 1.91 | 22.24 ± 2.67 | <b>4T1</b>      | 5.65 ± 0.76 | 13.95 ± 1.45 | 18.92 ± 1.10 |
| <b>CT26</b>      | 4.54 ± 0.60 | 11.70 ± 0.71 | 17.69 ± 0.78 | <b>CT26</b>     | 2.68 ± 0.37 | 14.62 ± 1.38 | 23.58 ± 2.07 |

  

| <b>C</b>        |             |             |             |
|-----------------|-------------|-------------|-------------|
| <b>BLM (nM)</b> | <b>IC30</b> | <b>IC50</b> | <b>IC70</b> |
| <b>B16-F10</b>  | 0.15 ± 0.05 | 0.34 ± 0.05 | 0.63 ± 0.04 |
| <b>4T1</b>      | 0.16 ± 0.04 | 0.35 ± 0.06 | 0.50 ± 0.10 |
| <b>CT26</b>     | 0.06 ± 0.02 | 0.27 ± 0.05 | 0.56 ± 0.07 |

## Supplementary figures

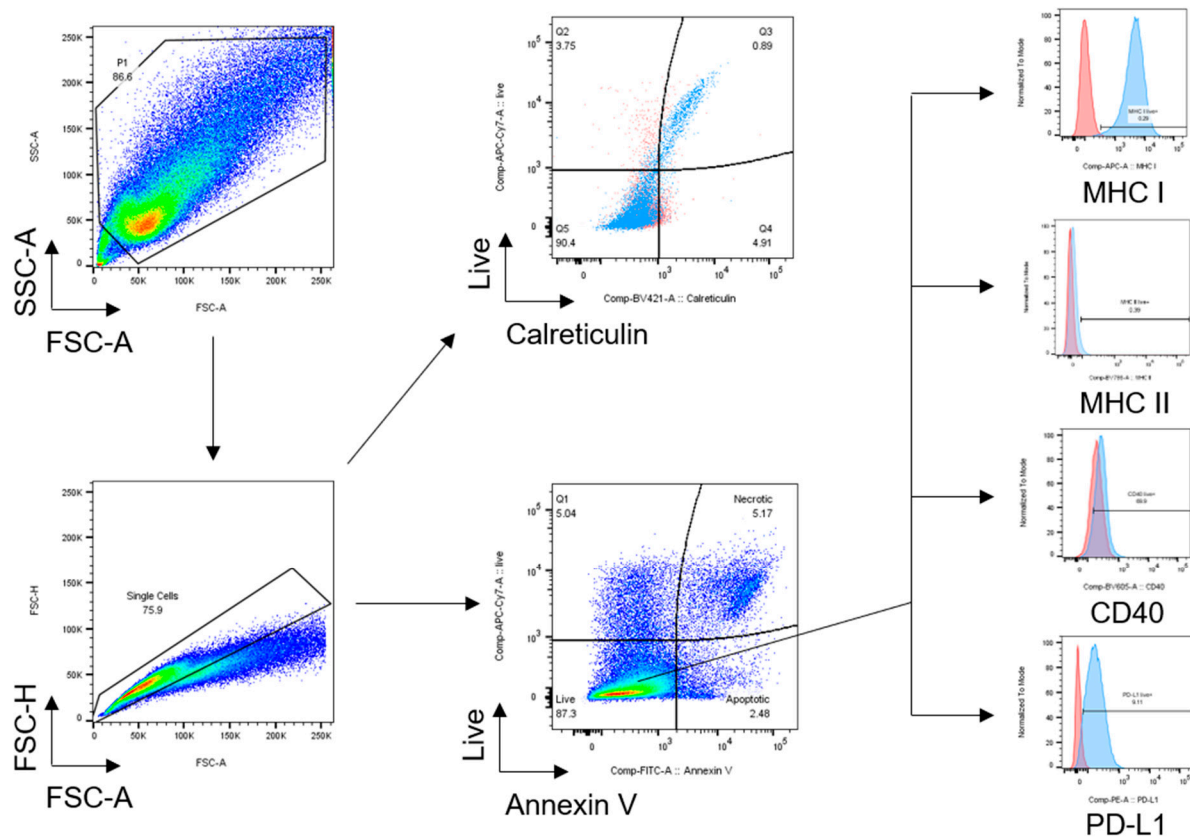

**Figure S1:** Gating strategy. After ECT experiments were performed, single cells were isolated from debris (SSC-A vs FSC-A) and doublets (FSC-H vs FSC-A). After gating of live and dead cells (efluor 780; APC-Cy7-A vs Annexin V), cells that express MHC I, MHC II, CD40 and PD-L1 were identified. After gating of single cells, cells that express Calreticulin (efluor 780; APC-Cy7-A vs BV421-A) were identified. Percentages shown are derived from the proportion of cells positive for each marker. A total of 100,000 events were collected. SSC-A, side-scatter area; FSC-A, forward-scatter area; FSC-H, forward-scatter height.

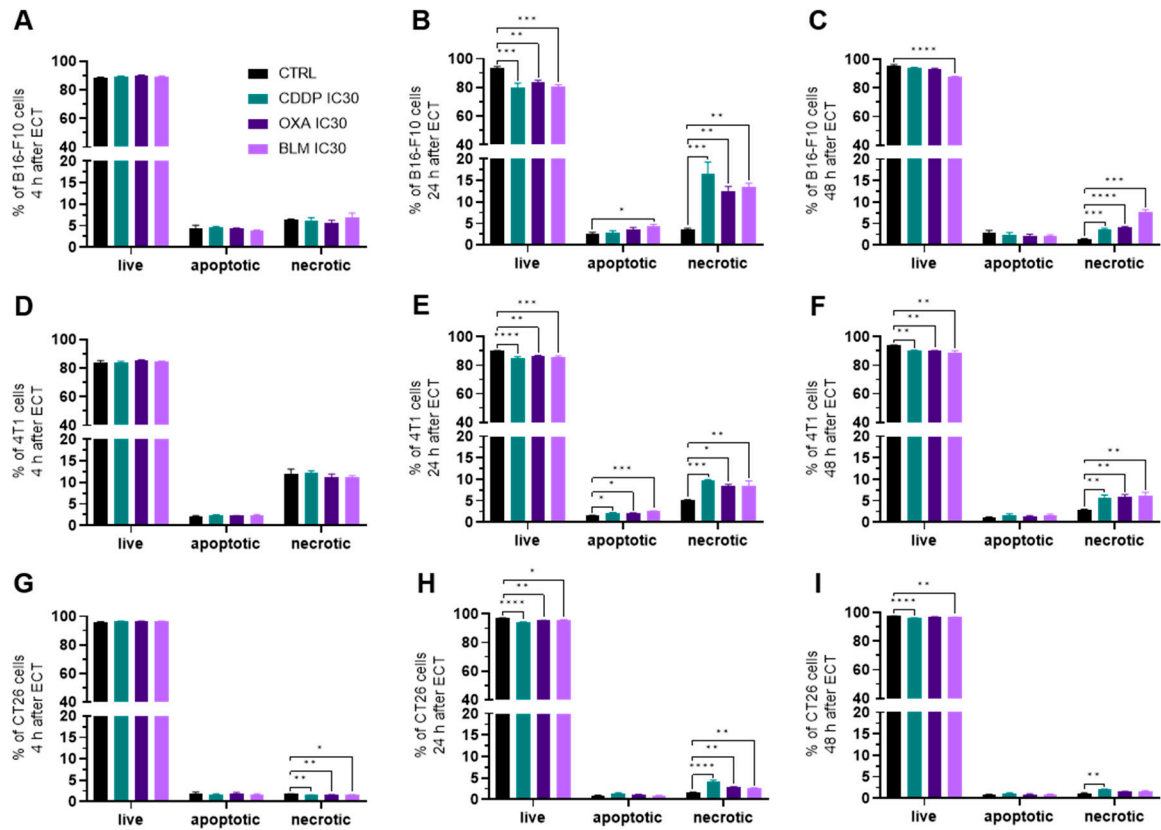

**Figure S2:** Cell viability at IC<sub>30</sub> concentrations. Cell viability in B16-F10 cell line 4 h (A), 24 h (B), 48 h (C) after ECT. Cell viability in 4T1 cell line 4 h (D), 24 h (E) and 48 h (F) after ECT. Cell viability in CT26 cell line 4 h (G), 24 h (H) and 48 h (I) after ECT. The values are presented as the AM ± SEM. \*p ≤ 0.05, \*\*p ≤ 0.01, \*\*\*p ≤ 0.001, \*\*\*\*p ≤ 0.0001, n = 4.

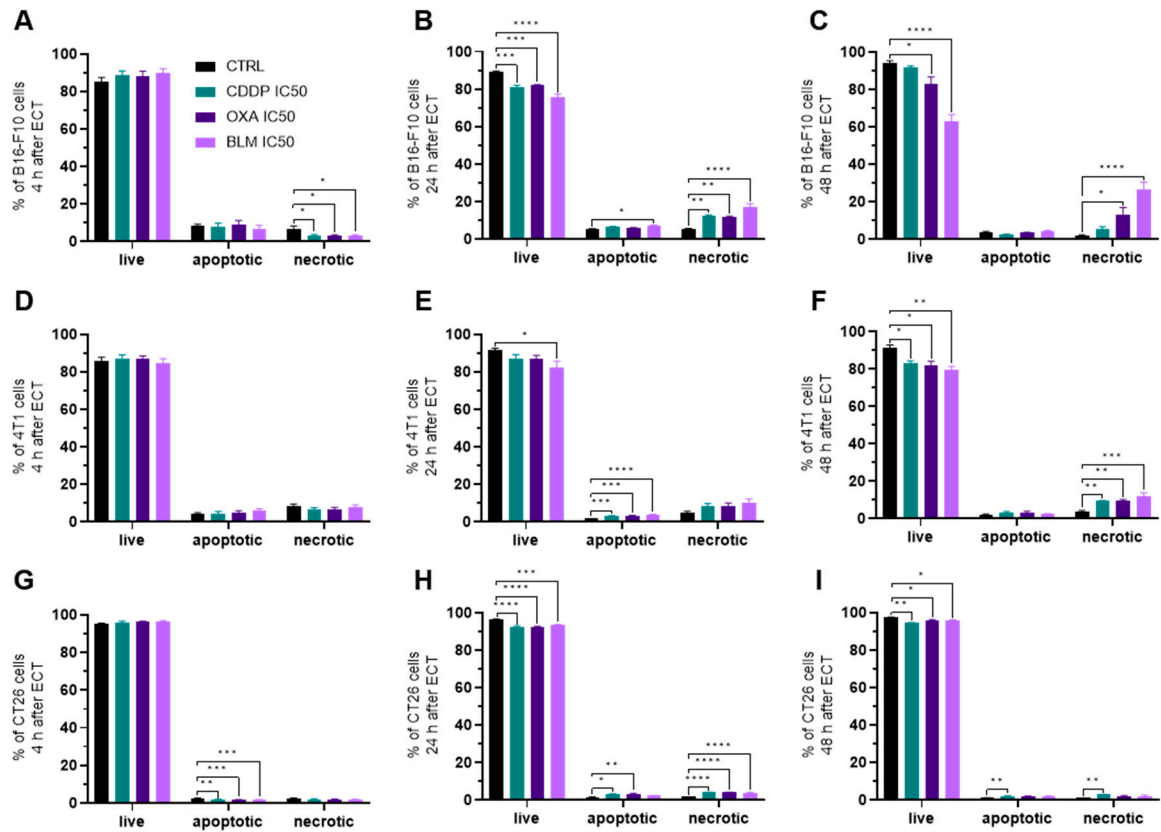

**Figure S3:** Cell viability at IC<sub>50</sub> concentrations. Cell viability in B16-F10 cell line 4 h (A), 24 h (B), 48 h (C) after ECT. Cell viability in 4T1 cell line 4 h (D), 24 h (E) and 48 h (F) after ECT. Cell viability in CT26 cell line 4 h (G), 24 h (H) and 48 h (I) after ECT. The values are presented as the AM ± SEM. \*p ≤ 0.05, \*\*p ≤ 0.01, \*\*\*p ≤ 0.001, \*\*\*\*p ≤ 0.0001, n = 4.



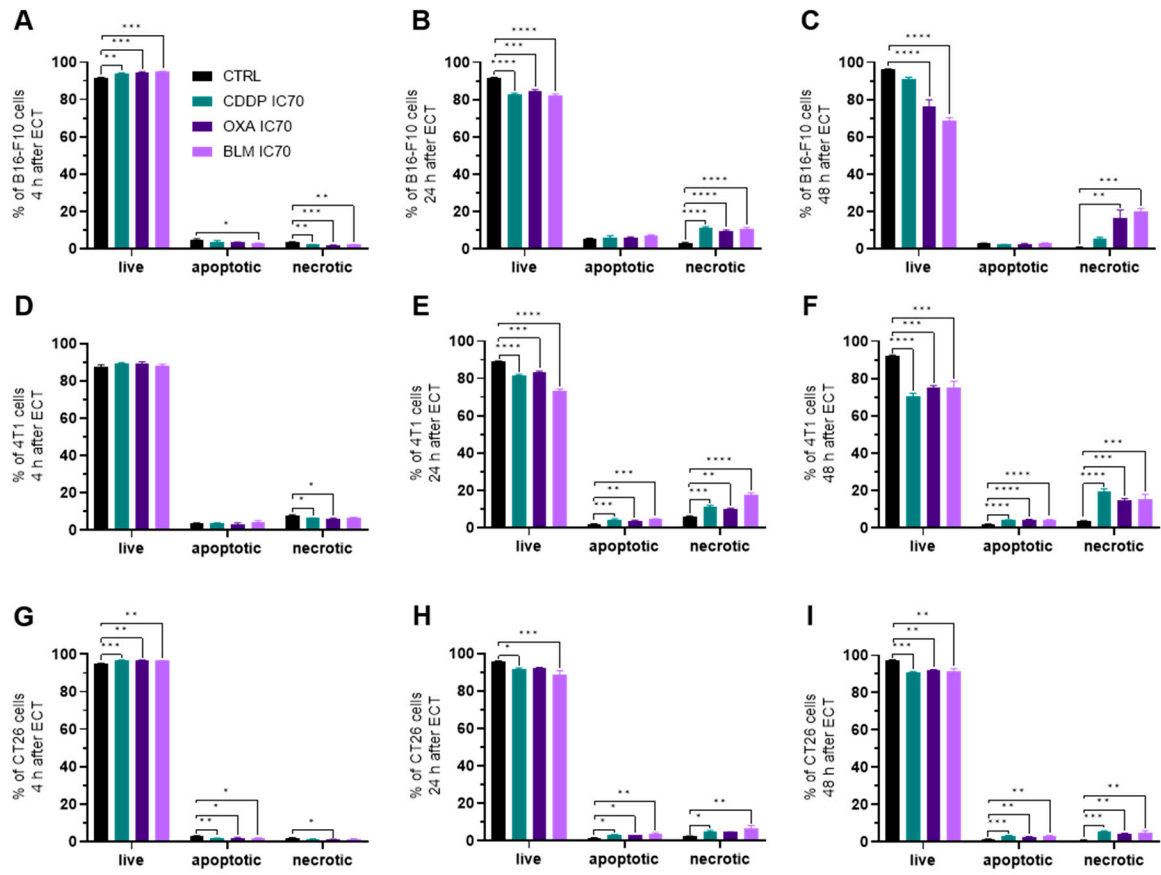

**Figure S4:** Cell viability at IC<sub>70</sub> concentrations. Cell viability in B16-F10 cell line 4 h (A), 24 h (B), 48 h (C) after ECT. Cell viability in 4T1 cell line 4 h (D), 24 h (E) and 48 h (F) after ECT. Cell viability in CT26 cell line 4 h (G), 24 h (H) and 48 h (I) after ECT. The values are presented as the AM ± SEM. \*p ≤ 0.05, \*\*p ≤ 0.01, \*\*\*p ≤ 0.001, \*\*\*\*p ≤ 0.0001, n = 4.

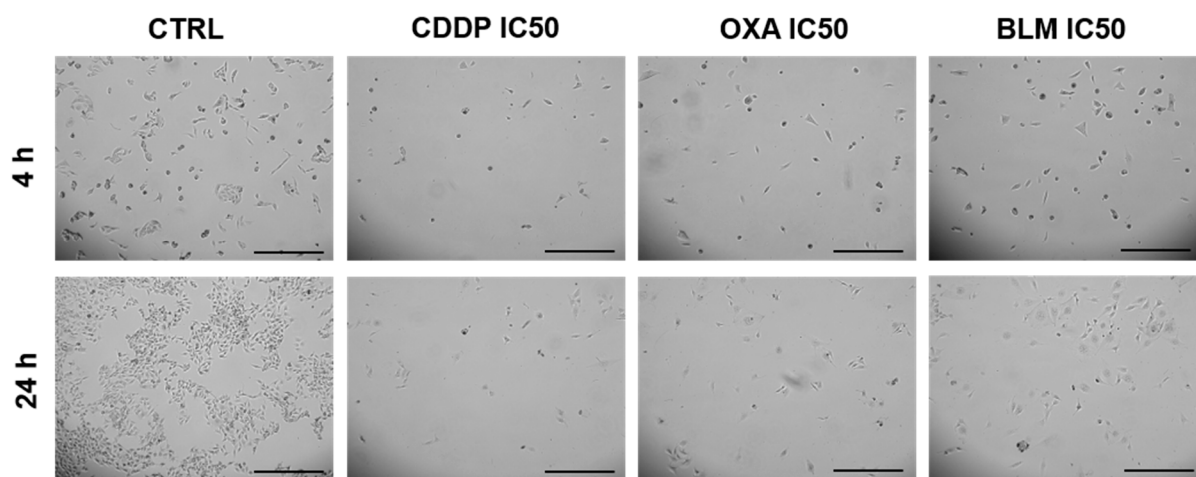

**Figure S5:** Cell number changes after ECT in the B16-F10 cell line. Cells 4 or 24 h after ECT with IC<sub>50</sub> concentrations of CDDP, OXA or BLM in comparison with untreated control cells. Scale bar: 0.5 mm.

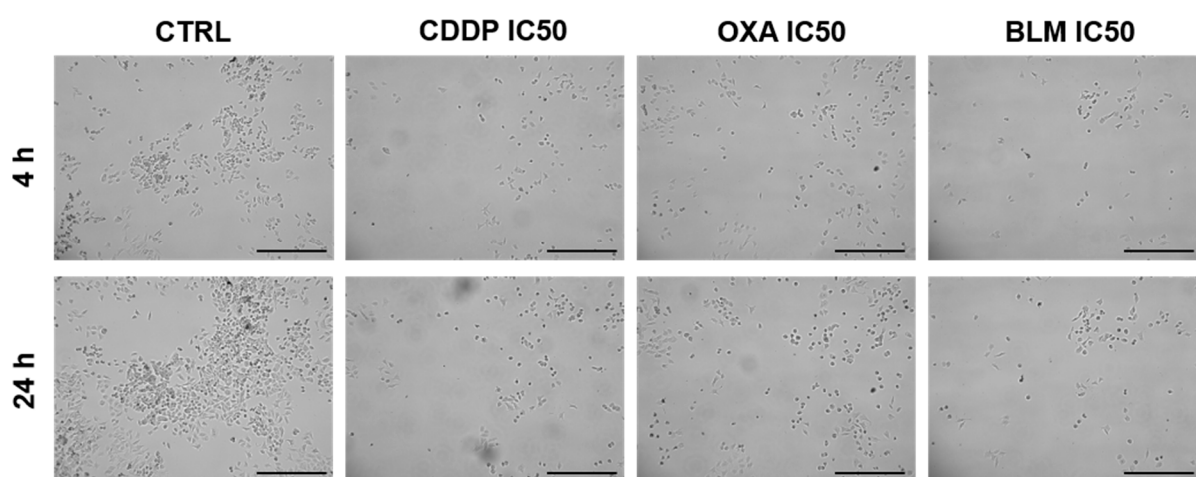

**Figure S6:** Cell number changes after ECT in the 4T1 cell line. Cells 4 or 24 h after ECT with IC<sub>50</sub> concentrations of CDDP, OXA or BLM in comparison with untreated control cells. Scale bar: 0.5 mm.

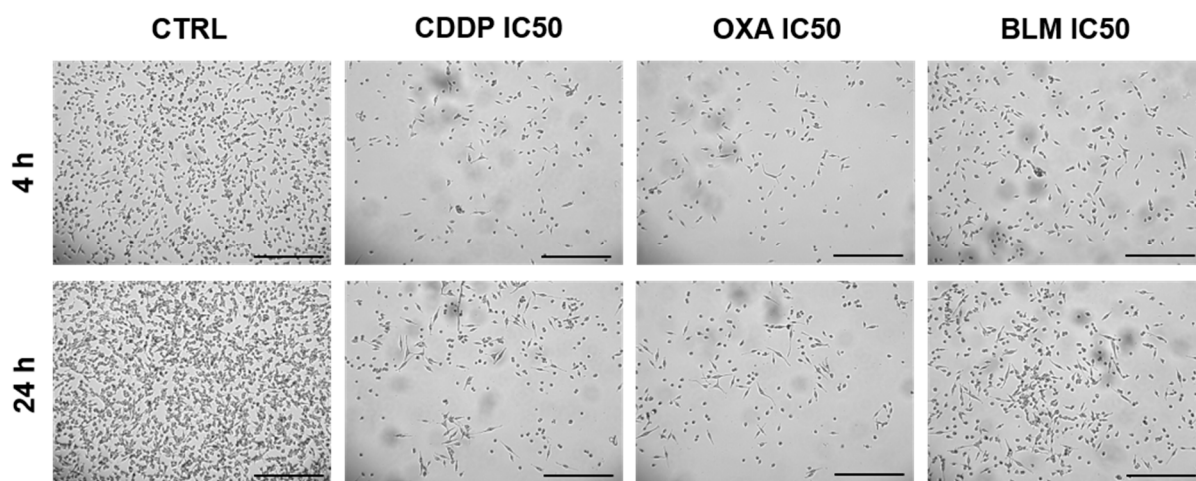

**Figure S7:** Cell number changes after ECT in the CT26 cell line. Cells 4 or 24 h after ECT with IC<sub>50</sub> concentrations of CDDP, OXA or BLM in comparison with untreated control cells. Scale bar: 0.5 mm.

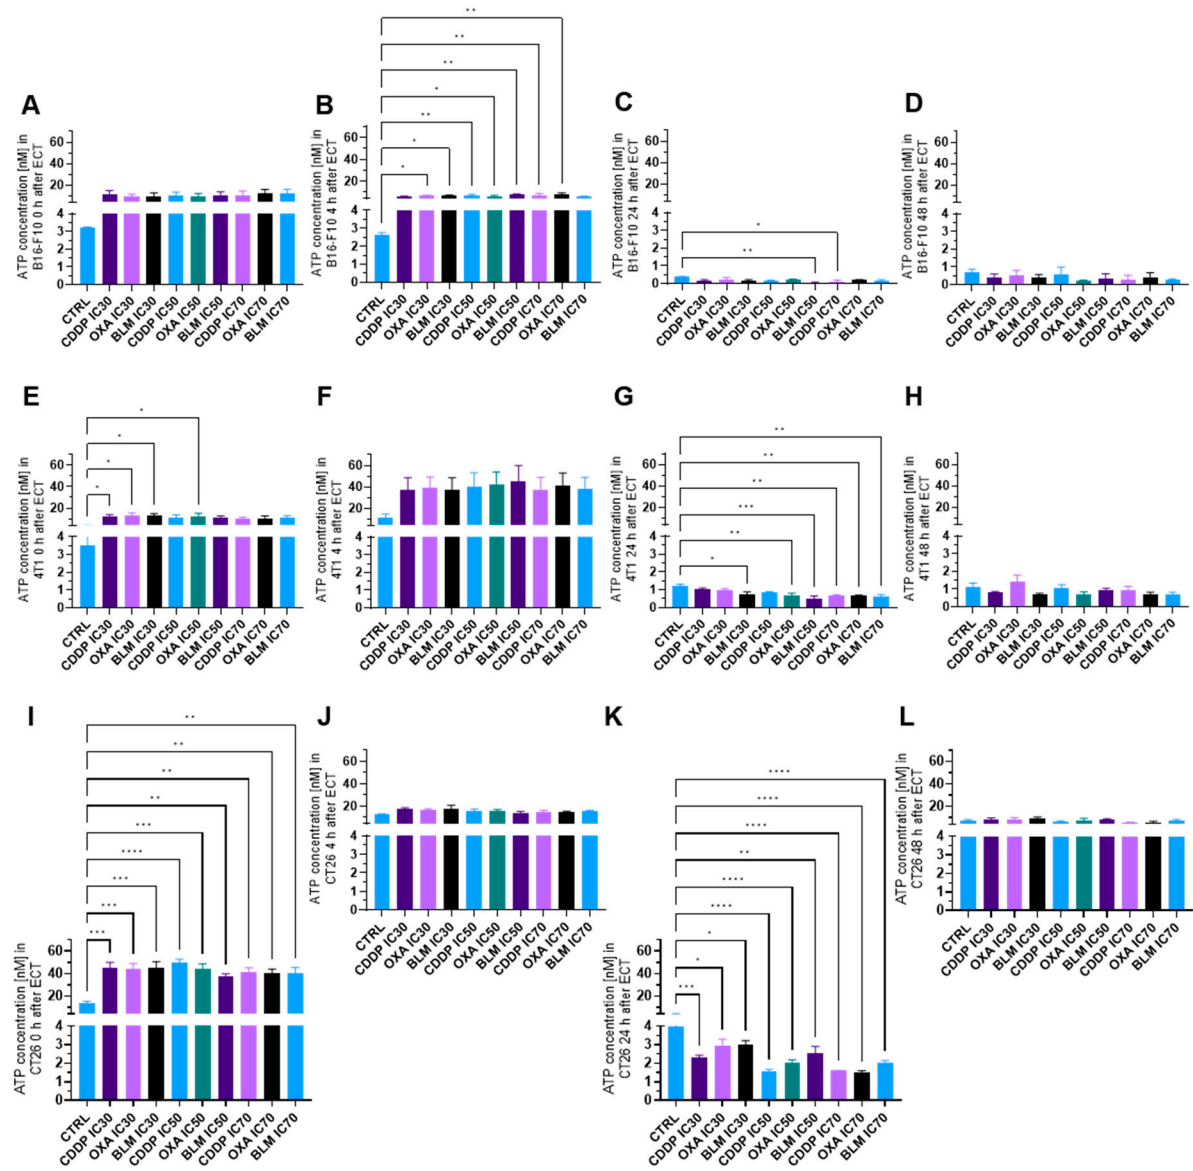

**Figure S8:** Released ATP concentration in B16-F10, 4T1 and CT26 cell lines. Released ATP concentration in B16-F10 cell line 0 h (A), 4 h (B), 24 h (C) and 48 h (D) after ECT. Released ATP concentration in 4T1 cell line 0 h (E), 4 h (F), 24 h (G) and 48 h (H) after ECT. Released ATP concentration in CT26 cell line 0 h (I), 4 h (J), 24 h (K) and 48 h (L) after ECT. The values are presented as the AM  $\pm$  SEM. \* $p \leq 0.05$ , \*\* $p \leq 0.01$ , \*\*\* $p \leq 0.001$ , \*\*\*\* $p \leq 0.0001$ ,  $n = 3$ .

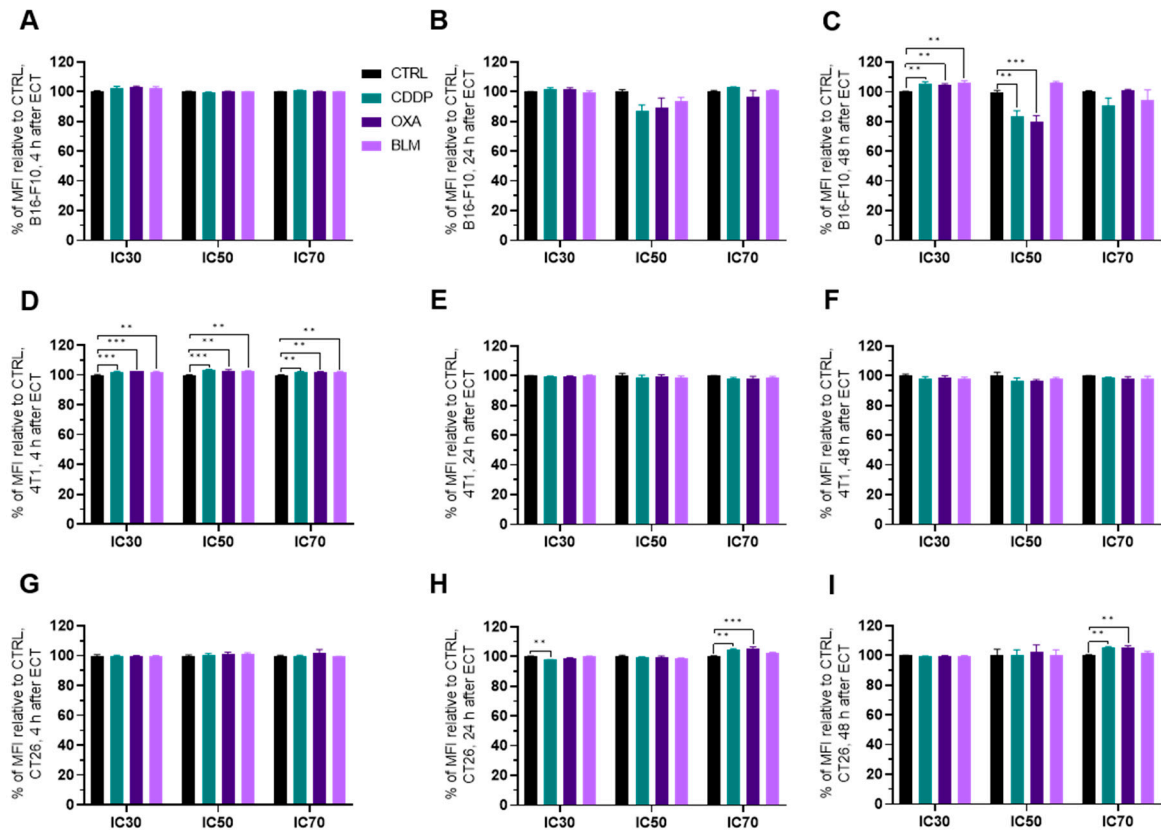

**Figure S9:** CRT expression after ECT. Calreticulin expression in B16-F10 cell line 4 h (A), 24 h (B), 48 h (C) after ECT. Calreticulin expression in 4T1 cell line 4 h (D), 24 h (E) and 48 h (F) after ECT. Calreticulin expression in CT26 cell line 4 h (G), 24 h (H) and 48 h (I) after ECT. The values are presented as the AM ± SEM. \*p ≤ 0.05, \*\*p ≤ 0.01, \*\*\*p ≤ 0.001, \*\*\*\*p ≤ 0.0001, n = 4.

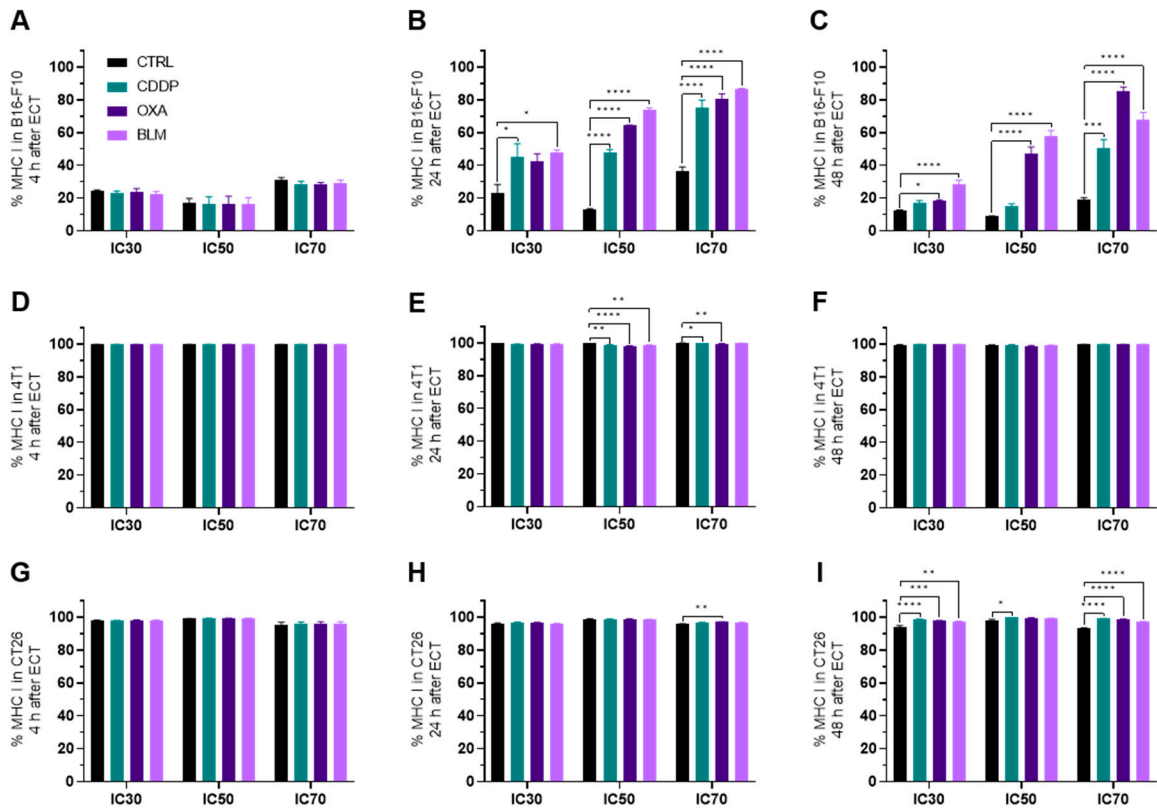

**Figure S10:** MHC I expression after ECT. Percent of MHC I positive cells is shown. MHC I expression in B16-F10 cell line 4 h (A), 24 h (B), 48 h (C) after ECT. MHC I expression in 4T1 cell line 4 h (D), 24 h (E) and 48 h (F) after ECT. MHC I expression in CT26 cell line 4 h (G), 24 h (H) and 48 h (I) after ECT. The values are presented as the AM  $\pm$  SEM. \* $p \leq 0.05$ , \*\* $p \leq 0.01$ , \*\*\* $p \leq 0.001$ , \*\*\*\* $p \leq 0.0001$ ,  $n = 4$ .

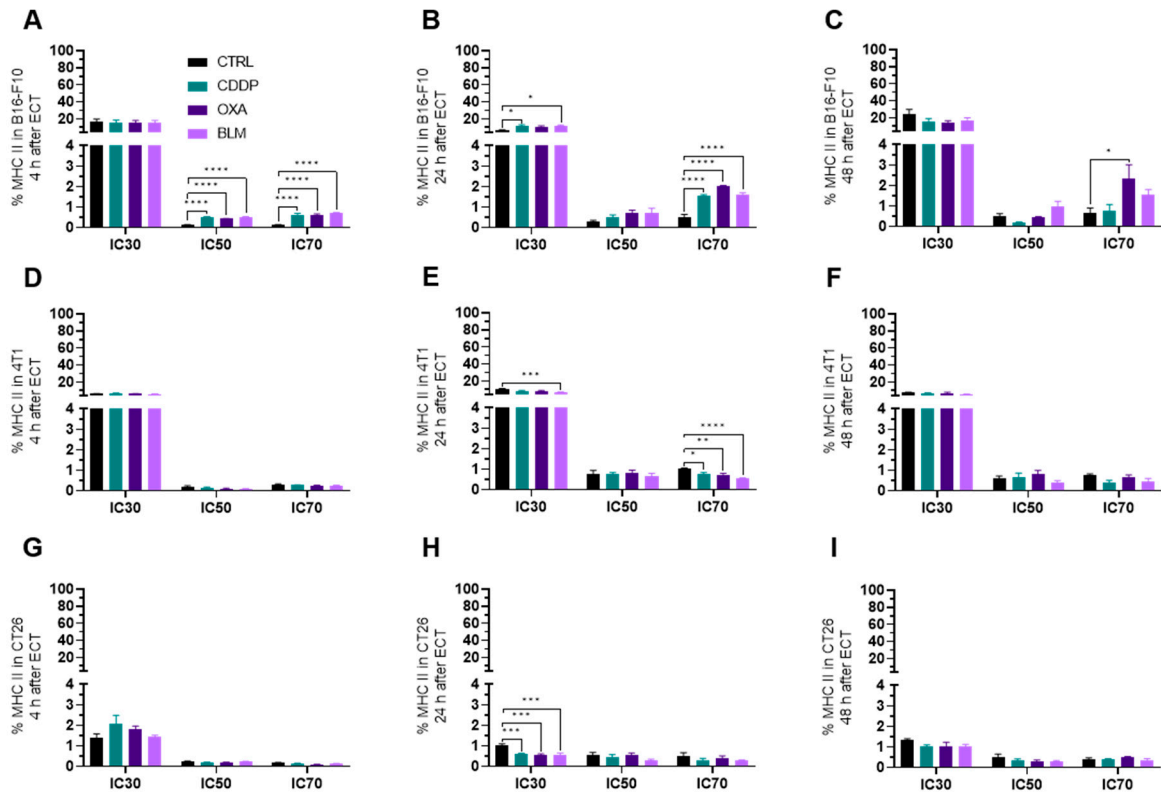

**Figure S11:** MHC II expression after ECT. Percent of MHC II positive cells is shown. MHC II expression in B16-F10 cell line 4 h (A), 24 h (B), 48 h (C) after ECT. MHC II expression in 4T1 cell line 4 h (D), 24 h (E) and 48 h (F) after ECT. MHC II expression in CT26 cell line 4 h (G), 24 h (H) and 48 h (I) after ECT. The values are presented as the AM  $\pm$  SEM. \* $p \leq 0.05$ , \*\* $p \leq 0.01$ , \*\*\* $p \leq 0.001$ , \*\*\*\* $p \leq 0.0001$ ,  $n = 4$ .



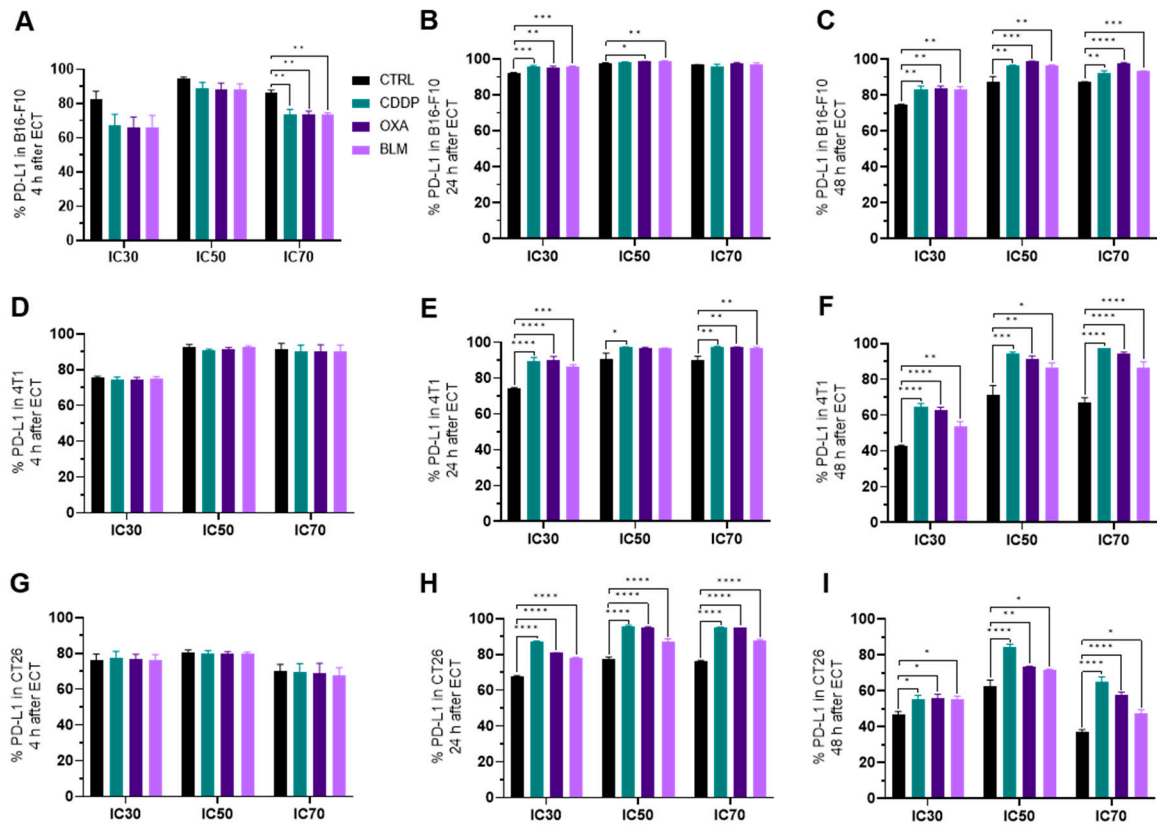

**Figure S12:** PD-L1 expression after ECT. PD-L1 expression in B16-F10 cell line 4 h (A), 24 h (B), 48 h (C) after ECT. PD-L1 expression in 4T1 cell line 4 h (D), 24 h (E) and 48 h (F) after ECT. PD-L1 expression in CT26 cell line 4 h (G), 24 h (H) and 48 h (I) after ECT. The values are presented as the AM  $\pm$  SEM. \* $p \leq 0.05$ , \*\* $p \leq 0.01$ , \*\*\* $p \leq 0.001$ , \*\*\*\* $p \leq 0.0001$ ,  $n = 4$ .

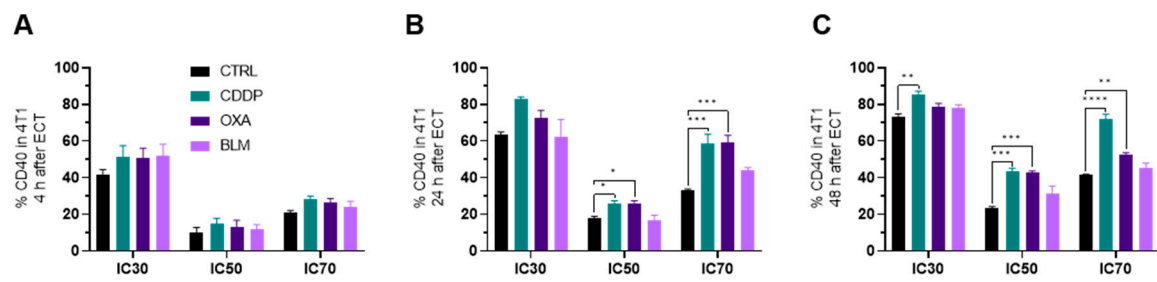

**Figure S13:** CD40 expression in the 4T1 cell line 4 h (A), 24 h (B), 48 h (C) after ECT. The values are presented as the AM  $\pm$  SEM. \* $p \leq 0.05$ , \*\* $p \leq 0.01$ , \*\*\* $p \leq 0.001$ , \*\*\*\* $p \leq 0.0001$ ,  $n = 4$ .
